# Supplementary material for: Increased Azithromycin Susceptibility of Multidrug-Resistant Gram-Negative Bacteria on RPMI-1640 Agar Assessed by Disk Diffusion Testing
Source: PubMed Central journal article supplement (PMC7277395; doi:10.3390/antibiotics9050218), 2020-04-29

**Table S1: Concentration of antibiotic disks**

Concentration of antibiotic disks used for disk diffusion assay.

IU: international units, disk size: 6 mm

|                   | <b>Antibiotic</b> | <b>Disk concentration</b> |
|-------------------|-------------------|---------------------------|
| <b>Macrolides</b> | Azithromycin      | 15 µg                     |
|                   | Erythromycin      | 15 IU                     |
|                   | Clarithromycin    | 15 µg                     |
|                   | Tobramycin        | 10 µg                     |
|                   | Cefepime          | 30 µg                     |
|                   | Tetracycline      | 30 IU                     |
|                   | Tigecycline       | 15 µg                     |

**Table S2: Decrease in resistance towards azithromycin in RPMI-1640 or MH containing NaHCO<sub>3</sub>.**

Azithromycin MICs of four strains per species (*K. pneumoniae*, *E. coli*, *E. cloacae* and *P. aeruginosa*) were measured in RPMI-1640 and MH with and without NaHCO<sub>3</sub> [2 g/L]. The decrease in resistance towards azithromycin is shown as fold change reduction of the MIC in RPMI or MH plus NaHCO<sub>3</sub> as compared to MH without NaHCO<sub>3</sub>.

| species              | Fold change reduction of azithromycin MIC in RPMI-1640 or MH + NaHCO <sub>3</sub> as compared to MH alone |                         |
|----------------------|-----------------------------------------------------------------------------------------------------------|-------------------------|
|                      | RPMI                                                                                                      | MH + NaHCO <sub>3</sub> |
| <i>K. pneumoniae</i> | 8                                                                                                         | 8                       |
|                      | 64                                                                                                        | 32                      |
|                      | 128                                                                                                       | 16                      |
|                      | 1                                                                                                         | 1                       |
| <i>E. coli</i>       | 256                                                                                                       | 16                      |
|                      | 64                                                                                                        | 16                      |
|                      | 64                                                                                                        | 32                      |
|                      | 256                                                                                                       | 32                      |
| <i>E. cloacae</i>    | 128                                                                                                       | 16                      |
|                      | 32                                                                                                        | 16                      |
|                      | 32                                                                                                        | 16                      |
|                      | 128                                                                                                       | 16                      |
| <i>P. aeruginosa</i> | 32                                                                                                        | 8                       |
|                      | 1                                                                                                         | 1                       |
|                      | 32                                                                                                        | 4                       |
|                      | 1                                                                                                         | 1                       |

**Table S3: Median erythromycin and tetracycline inhibition zone diameters of *Enterobacteriaceae* and *P. aeruginosa* on MH and RPMI-1640 agar.**

Erythromycin and tetracycline susceptibility of *Enterobacteriaceae* (28 *E. coli*, 24 *E. cloacae* and 26 *K. pneumoniae*) and 55 *P. aeruginosa* isolates was measured by disk diffusion on MH and RPMI-1640 agar. Data show median + interquartile range, Nonparametric Mann-Whitney Test, ns: not significant\*\* <0.001, \*\*\* <0.0001. IU: international units, disk size: 6 mm, 15 IU erythromycin, 30 IU tetracycline.

| <b>erythromycin</b>       |                      |                  |                                |
|---------------------------|----------------------|------------------|--------------------------------|
|                           | <b>species</b>       | <b>MH [mm]</b>   | <b>RPMI [mm]</b>               |
| <i>Enterobacteriaceae</i> | <i>E. coli</i>       | 6 (6-6)          | 7.5 (6-9.5) <sup>***</sup>     |
|                           | <i>E. cloacae</i>    | 6 (6-6)          | 6 (6-6) <sup>ns</sup>          |
|                           | <i>K. pneumoniae</i> | 6 (6-6)          | 6 (6-7.1) <sup>**</sup>        |
|                           | <i>P. aeruginosa</i> | 6 (6-6)          | 6 (6-6.6) <sup>ns</sup>        |
| <b>tetracycline</b>       |                      |                  |                                |
|                           | <b>species</b>       | <b>MH [mm]</b>   | <b>RPMI [mm]</b>               |
| <i>Enterobacteriaceae</i> | <i>E. coli</i>       | 11.5 (6-27.5)    | 12.25 (6-27.4) <sup>ns</sup>   |
|                           | <i>E. cloacae</i>    | 23 (19.1-24.5)   | 22.4 (18.6-23.7) <sup>ns</sup> |
|                           | <i>K. pneumoniae</i> | 24.3 (20.6-25.6) | 24.8 (18.4-26.1) <sup>ns</sup> |
|                           | <i>P. aeruginosa</i> | 14 (7.2-19.6)    | 10.2 (6.2-15.7) <sup>ns</sup>  |

**Figure S1: Increased azithromycin susceptibility in carbapenemase-positive *Enterobacteriaceae* on RPMI-1640 agar as compared to MH agar.**

Azithromycin susceptibility of various carbapenemase-positive *Enterobacteriaceae* isolates (2 *E. coli*, 14 *K. pneumoniae*, 1 *Citrobacter koseri*, 1 *Proteus mirabilis*, 1 *Morganella morganii*) and of one carbapenemase-positive *P. aeruginosa* isolate was measured in MH (filled bars) and RPMI-1640 (open bars) media by disk diffusion. Each isolate was tested in two independent experiments. Data display mean ( $\pm$  SD for *K. pneumoniae*). Disk size: 6 mm, 15  $\mu$ g azithromycin.

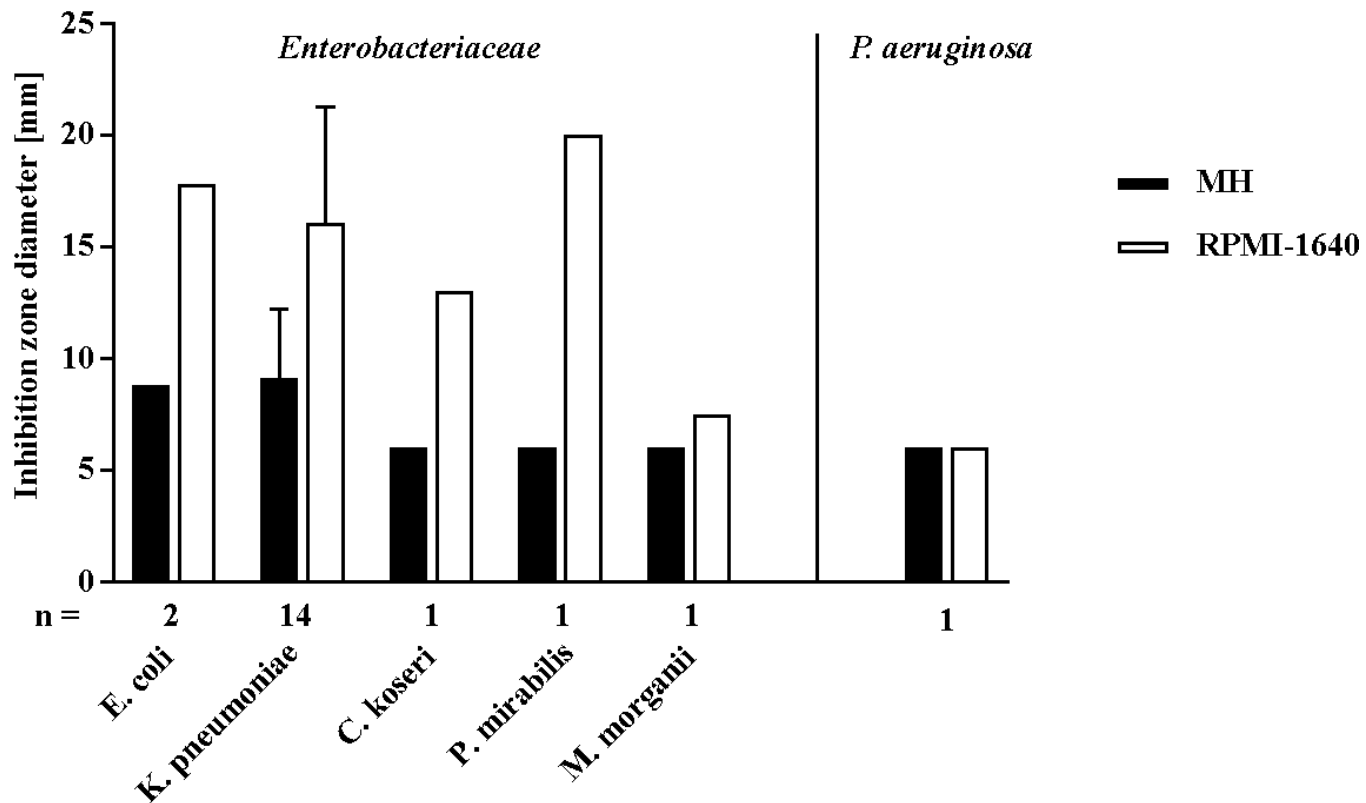

Supplement: antibiotics-09-00218-s001.pdf [file antibiotics-09-00218-s001.pdf]
